# Supplementary material for: Divergent biophysical responses of western United States forests to wildfire driven by eco-climatic gradients
Source: Copernicus journal article supplement (doi:10.5194/bg-21-2207-2024), 2024-05-06
Supplement: Supplementary file 1 [file bg-21-2207-2024-supplement.pdf]

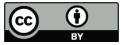

*Supplement of*

## **Divergent biophysical responses of western United States forests to wildfire driven by eco-climatic gradients**

**Surendra Shrestha et al.**

*Correspondence to:* Surendra Shrestha (surshrestha@clarku.edu, sbs.stha111@gmail.com)

The copyright of individual parts of the supplement might differ from the article licence.

## Supplementary Information

Table S1: Study area characteristics

| <b>Ecoregions</b> | <b>Total Area<br/>(km<sup>2</sup>)</b> | <b>Forest Area<br/>(km<sup>2</sup>)</b> | <b>Total Burned<br/>Area (km<sup>2</sup>)</b> | <b>Mean Annual<br/>Precipitation<br/>(mm)</b> | <b>Mean Monthly<br/>Temperature<br/>(°C)</b> |
|-------------------|----------------------------------------|-----------------------------------------|-----------------------------------------------|-----------------------------------------------|----------------------------------------------|
| Eastern Cascades  | 56187.34                               | 27846.81                                | 1703.32                                       | 575                                           | 7.6                                          |
| Coastal Sage      | 101081.91                              | 5411.55                                 | 5891.52                                       | 507                                           | 16                                           |
| Baja CA           | 17919.06                               | 3006.51                                 | 3084.86                                       | 454                                           | 14.2                                         |
| Klamath           |                                        |                                         |                                               |                                               |                                              |
| Mountians         | 48541.20                               | 29947.89                                | 3736.13                                       | 1397                                          | 11.6                                         |
| Sierra Nevada     | 52706.85                               | 29632.99                                | 3033.34                                       | 1016                                          | 8.6                                          |
| Canadian Rockies  | 18880.52                               | 8788.56                                 | 1455.60                                       | 1125                                          | 3.1                                          |
| Middle Rockies    | 156471.79                              | 48140.21                                | 4977.51                                       | 609                                           | 3.3                                          |
| Southern Rockies  | 145700.65                              | 57834.20                                | 1698.16                                       | 575                                           | 4.6                                          |
| North Cascades    | 30391.80                               | 15061.96                                | 1252.96                                       | 1817                                          | 5.7                                          |
| Idaho-Batholith   | 60280.66                               | 29981.59                                | 5883.15                                       | 828                                           | 4.3                                          |
| Columbia          |                                        |                                         |                                               |                                               |                                              |
| Mountains         | 81957.75                               | 41911.46                                | 1580.32                                       | 798                                           | 6.4                                          |
| Blue Mountains    | 70906.05                               | 24066.24                                | 3917.74                                       | 520                                           | 7.5                                          |
| Great Plains      | 201807.49                              | 3092.37                                 | 3126.93                                       | 391                                           | 7.3                                          |
| Temperate Sierras | 108628.45                              | 56339.32                                | 7753.26                                       | 431                                           | 11.7                                         |
| AZ-NM Plateau     | 150081.62                              | 18455.92                                | 914.66                                        | 245                                           | 11.3                                         |
| Central Basin     | 309971.20                              | 33496.20                                | 13084.30                                      | 258                                           | 9.6                                          |
| Colorado Plateau  | 134929.93                              | 25656.65                                | 933.34                                        | 291                                           | 10.2                                         |
| Mojave Basin      | 129602.96                              | 2505.71                                 | 2444.75                                       | 148                                           | 17.8                                         |
| NA highland       | 42926.15                               | 4686.64                                 | 2147.02                                       | 345                                           | 16.6                                         |
| Wasatch           |                                        |                                         |                                               |                                               |                                              |
| Mountains         | 45686.02                               | 15710.65                                | 680.04                                        | 585                                           | 5.4                                          |
| Cascades          | 46429.60                               | 35354.93                                | 806.69                                        | 1803                                          | 7.9                                          |

Table S2: Pre-fire and post-fire summer LAI (post-fire/pre-fire) across ecoregions of each forest type.

| <b>Forest Types/Ecoregions</b> | <b>Pre-fire</b> | <b>1-Yr Post-fire</b> | <b>10-Yr Post-fire</b> | <b>20-Yr Post-fire</b> | <b>25-Yr Post-fire</b> |
|--------------------------------|-----------------|-----------------------|------------------------|------------------------|------------------------|
| <b>Douglas-fir</b>             |                 |                       |                        |                        |                        |
| Cascades                       | 3.61            | 1.10(30)              | 2.35(65)               | 3.23(89)               | 3.55(98)               |
| Columbia Mountains             | 2.72            | 0.85(31)              | 1.84(68)               | 2.70(99)               | 3.37(124)              |
| Idaho Batholith                | 1.70            | 0.66(39)              | 1.08(63)               | 1.11(65)               | 1.22(72)               |
| Klamath Mountains              | 2.84            | 0.94(33)              | 2.02(71)               | 3.11(110)              | 3.08(108)              |
| Middle Rockies                 | 1.84            | 0.72(39)              | 1.21(66)               | 1.48(81)               | 1.63(89)               |
| North Cascades                 | 2.20            | 0.59(27)              | 1.31(59)               | 1.84(84)               | 1.93(88)               |
| Southern Rockies               | 1.69            | 0.47(28)              | 0.69(41)               | 1.71(101)              |                        |
| Temperate Sierra               | 1.73            | 0.61(35)              | 1.13(65)               | 1.43(82)               | 1.31(76)               |
| <b>Lodgepole Pine</b>          |                 |                       |                        |                        |                        |
| Canadian Rockies               | 1.94            | 0.66(34)              | 1.64(85)               | 1.34(69)               | 1.52(78)               |
| Columbia Mountains             | 2.39            | 0.62(26)              | 1.58(66)               | 2.22(93)               | 2.84(119)              |
| Idaho Batholith                | 1.66            | 0.66(40)              | 1.03(62)               | 1.19(72)               | 1.31(79)               |
| Middle Rockies                 | 1.68            | 0.59(35)              | 1.05(62)               | 1.08(64)               | 1.22(73)               |
| Northern Cascades              | 1.69            | 0.54(32)              | 1.14(67)               | 1.14(67)               | 1.27(75)               |
| Southern Rockies               | 1.54            | 0.80(52)              | 1.10(72)               | 1.38(89)               | 1.35(87)               |
| <b>Mixed Conifer</b>           |                 |                       |                        |                        |                        |
| Baja California                | 1.53            | 0.59(38)              | 1.16(76)               | 1.58(103)              | 1.24(81)               |
| Coastal Sage                   | 2.88            | 0.84(29)              | 2.15(75)               | 2.72(94)               |                        |
| Eastern Cascades               | 2.13            | 0.789(37)             | 1.51(71)               | 3.06(144)              | 3.31(155)              |
| Klamath Mountains              | 3.05            | 1.02(33)              | 2.27(74)               | 2.63(86)               | 2.72(89)               |
| Sierra Nevada                  | 2.68            | 0.78(29)              | 1.76(66)               | 2.47(92)               | 2.61(97)               |
| <b>Pinyon-Juniper</b>          |                 |                       |                        |                        |                        |
| AZ-NM Plateau                  | 0.75            | 0.48(65)              | 0.84(113)              | 0.86(115)              | 0.79(105)              |
| Central Basin                  | 0.72            | 0.40(56)              | 0.54(75)               | 0.47(66)               | 0.47(65)               |
| Colorado Plateau               | 0.90            | 0.52(58)              | 0.80(89)               | 0.70(78)               | 0.71(78)               |
| Mojave Basin                   | 0.63            | 0.34(53)              | 0.48(76)               | 0.75(120)              | 0.43(68)               |
| Temperate Sierras              | 0.92            | 0.48(52)              | 0.82(90)               | 0.85(93)               | 0.89(97)               |
| <b>Ponderosa Pine</b>          |                 |                       |                        |                        |                        |
| Blue Mountains                 | 1.41            | 0.64(45)              | 1.04(74)               | 0.99(70)               | 0.83(59)               |
| Eastern Cascades               | 1.61            | 0.66(41)              | 1.45(91)               | 1.28(80)               | 1.51(94)               |
| Great Plains                   | 1.37            | 0.83(60)              | 0.71(51)               | 1.42(104)              | 1.46(106)              |
| Sierra Nevada                  | 1.94            | 0.46(24)              | 1.03(53)               | 1.18(61)               | 1.28(66)               |
| Temperate Sierras              | 1.48            | 0.54(37)              | 0.90(60)               | 1.30(87)               | 1.23(83)               |
| Southern Rockies               | 1.45            | 0.58(40)              | 0.84(58)               | 1.37(95)               |                        |
| <b>Oak</b>                     |                 |                       |                        |                        |                        |
| Baja CA                        | 1.88            | 0.72(38)              | 1.51(80)               | 1.44(77)               | 1.34(71)               |
| Coastal Sage                   | 2.40            | 0.69(29)              | 1.55(64)               | 2.20(92)               | 1.89(79)               |
| North America Highland         | 1.31            | 0.68(52)              | 0.86(66)               | 0.88(67)               | 0.85(65)               |
| Temperate Sierras              | 1.22            | 0.66(54)              | 1.09(90)               | 1.42(117)              | 1.07(88)               |

**Spruce/Fir/Hemlock**

|                         |      |          |          |           |           |
|-------------------------|------|----------|----------|-----------|-----------|
| Blue Mountains          | 1.98 | 0.71(36) | 1.35(68) | 1.47(75)  | 1.61(81)  |
| Columbia Mountains      | 2.20 | 0.68(31) | 1.40(64) | 2.23(101) | 2.62(119) |
| Idaho Batholith         | 1.59 | 0.58(36) | 0.89(56) | 1.01(64)  | 1.15(72)  |
| Canadian Rockies        | 1.96 | 0.66(34) | 1.38(70) | 1.01(52)  | 1.20(61)  |
| Middle Rockies          | 1.44 | 0.49(34) | 0.91(63) | 0.78(54)  | 0.91(63)  |
| Northern Cascades       | 1.80 | 0.49(27) | 1.12(62) | 1.17(65)  | 1.13(63)  |
| Southern Rockies        | 1.52 | 0.77(51) | 1.12(74) | 1.36(90)  |           |
| Wasatch/Unita Mountains | 1.57 | 0.69(44) | 1.05(67) | 2.44(156) |           |

---

Table S3: Pre-fire and post-fire summer albedo (post-fire/pre-fire) across ecoregions of each forest type.

| <b>Forest Types/Ecoregions</b> | <b>Pre-fire</b> | <b>1-Yr Post-fire</b> | <b>10-Yr Post-fire</b> | <b>20-Yr Post-fire</b> | <b>25-Yr Post-fire</b> |
|--------------------------------|-----------------|-----------------------|------------------------|------------------------|------------------------|
| <b>Douglas-fir</b>             |                 |                       |                        |                        |                        |
| Cascades                       | 0.10            | 0.08(84)              | 0.11(115)              | 0.11(118)              | 0.11(117)              |
| Columbia Mountains             | 0.10            | 0.09(90)              | 0.12(126)              | 0.12(129)              | 0.12(124)              |
| Idaho Batholith                | 0.09            | 0.09(95)              | 0.12(126)              | 0.13(137)              | 0.13(140)              |
| Klamath Mountains              | 0.11            | 0.09(80)              | 0.11(104)              | 0.12(115)              | 0.12(110)              |
| Middle Rockies                 | 0.10            | 0.09(98)              | 0.12(128)              | 0.12(126)              | 0.12(124)              |
| North Cascades                 | 0.09            | 0.08(95)              | 0.11(131)              | 0.13(154)              | 0.13(149)              |
| Southern Rockies               | 0.10            | 0.10(99)              | 0.13(139)              | 0.14(143)              |                        |
| Temperate Sierra               | 0.10            | 0.09(91)              | 0.12(123)              | 0.13(130)              | 0.13(130)              |
| <b>Lodgepole Pine</b>          |                 |                       |                        |                        |                        |
| Canadian Rockies               | 0.09            | 0.09(95)              | 0.12(129)              | 0.11(127)              | 0.12(129)              |
| Columbia Mountains             | 0.08            | 0.08(89)              | 0.11(131)              | 0.12(137)              | 0.11(134)              |
| Idaho Batholith                | 0.08            | 0.08(95)              | 0.11(130)              | 0.11(138)              | 0.11(140)              |
| Middle Rockies                 | 0.08            | 0.08(93)              | 0.11(130)              | 0.11(141)              | 0.11(139)              |
| Northern Cascades              | 0.08            | 0.07(98)              | 0.10(134)              | 0.11(140)              | 0.11(143)              |
| Southern Rockies               | 0.10            | 0.10(100)             | 0.13(132)              | 0.11(113)              | 0.10(108)              |
| <b>Mixed Conifer</b>           |                 |                       |                        |                        |                        |
| Baja California                | 0.11            | 0.11(101)             | 0.15(133)              | 0.13(122)              | 0.13(115)              |
| Coastal Sage                   | 0.11            | 0.09(87)              | 0.13(119)              | 0.12(112)              |                        |
| Eastern Cascades               | 0.10            | 0.10(99)              | 0.14(137)              | 0.13(128)              | 0.13(123)              |
| Klamath Mountains              | 0.10            | 0.09(85)              | 0.11(109)              | 0.12(117)              | 0.12(118)              |
| Sierra Nevada                  | 0.10            | 0.09(89)              | 0.14(133)              | 0.13(123)              | 0.12(118)              |
| <b>Pinyon-Juniper</b>          |                 |                       |                        |                        |                        |
| AZ-NM Plateau                  | 0.12            | 0.14(117)             | 0.14(121)              | 0.13(114)              | 0.12(106)              |
| Central Basin                  | 0.12            | 0.13(112)             | 0.15(127)              | 0.15(125)              | 0.14(120)              |
| Colorado Plateau               | 0.11            | 0.13(111)             | 0.15(130)              | 0.15(128)              | 0.14(125)              |
| Mojave Basin                   | 0.14            | 0.16(117)             | 0.16(117)              | 0.14(105)              | 0.15(109)              |
| Temperate Sierras              | 0.12            | 0.13(103)             | 0.14(112)              | 0.13(106)              | 0.13(107)              |
| <b>Ponderosa Pine</b>          |                 |                       |                        |                        |                        |
| Blue Mountains                 | 0.11            | 0.11(92)              | 0.14(123)              | 0.14(122)              | 0.13(114)              |
| Eastern Cascades               | 0.11            | 0.10(93)              | 0.13(124)              | 0.12(114)              | 0.12(112)              |
| Great Plains                   | 0.13            | 0.13(104)             | 0.17(132)              | 0.16(123)              | 0.16(125)              |
| Sierra Nevada                  | 0.12            | 0.12(99)              | 0.15(124)              | 0.14(118)              | 0.14(116)              |
| Temperate Sierras              | 0.10            | 0.10(99)              | 0.13(138)              | 0.12(127)              | 0.12(120)              |
| Southern Rockies               | 0.11            | 0.10(95)              | 0.13(123)              | 0.13(119)              |                        |
| <b>Oak</b>                     |                 |                       |                        |                        |                        |
| Baja CA                        | 0.12            | 0.13(108)             | 0.13(111)              | 0.13(108)              | 0.12(101)              |
| Coastal Sage                   | 0.12            | 0.12(95)              | 0.13(108)              | 0.13(104)              | 0.11(90)               |
| North America Highland         | 0.12            | 0.14(111)             | 0.14(117)              | 0.14(112)              | 0.14(116)              |
| Temperate Sierras              | 0.12            | 0.13(105)             | 0.14(111)              | 0.13(104)              | 0.13(105)              |

**Spruce/Fir/Hemlock**

|                            |      |          |           |           |           |
|----------------------------|------|----------|-----------|-----------|-----------|
| Blue Mountains             | 0.09 | 0.08(93) | 0.12(132) | 0.12(132) | 0.11(128) |
| Columbia Mountains         | 0.08 | 0.07(91) | 0.11(131) | 0.12(152) | 0.12(146) |
| Idaho Batholith            | 0.08 | 0.08(97) | 0.11(133) | 0.13(148) | 0.13(152) |
| Canadian Rockies           | 0.09 | 0.09(96) | 0.12(133) | 0.12(140) | 0.13(142) |
| Middle Rockies             | 0.09 | 0.08(94) | 0.11(129) | 0.12(145) | 0.12(145) |
| Northern Cascades          | 0.07 | 0.07(95) | 0.10(133) | 0.11(150) | 0.11(150) |
| Southern Rockies           | 0.09 | 0.09(97) | 0.12(132) |           |           |
| Wasatch/Unita<br>Mountains | 0.11 | 0.10(97) | 0.13(124) | 0.13(123) |           |

---

Table S4: Pre-fire and post-fire winter albedo (post-fire/post-fire) across ecoregions of each forest type.

| <b>Forest Types/Ecoregions</b> | <b>Pre-fire</b> | <b>1-Yr Post-fire</b> | <b>10-Yr Post-fire</b> | <b>20-Yr Post-fire</b> | <b>25-Yr Post-fire</b> |
|--------------------------------|-----------------|-----------------------|------------------------|------------------------|------------------------|
| <b>Regions</b>                 |                 |                       |                        |                        |                        |
| Idaho Batholith                | 0.39            | 0.37(95)              | 0.44(112)              | 0.51(131)              | 0.51(130)              |
| Middle Rockies                 | 0.43            | 0.46(108)             | 0.49(115)              | 0.50(117)              |                        |
| Northern Cascades              | 0.15            | 0.37(240)             | 0.45(292)              | 0.40(258)              | 0.36(231)              |
| <b>Lodgepole Pine</b>          |                 |                       |                        |                        |                        |
| Idaho Batholith                | 0.39            | 0.39(100)             | 0.46(117)              | 0.53(136)              | 0.45(115)              |
| Middle Rockies                 | 0.25            | 0.38(153)             | 0.50(204)              | 0.56(227)              | 0.50(202)              |
| Southern Rockies               | 0.42            | 0.47(113)             | 0.43(104)              |                        |                        |
| <b>Mixed Conifer</b>           |                 |                       |                        |                        |                        |
| Eastern Cascades               | 0.26            | 0.40(152)             | 0.55(209)              | 0.44(167)              | 0.70(266)              |
| Klamath Mountains              | 0.16            | 0.10(65)              | 0.17(105)              | 0.24(151)              | 0.15(97)               |
| Sierra Nevada                  | 0.17            | 0.25(149)             | 0.44(264)              | 0.26(157)              | 0.25(151)              |
| <b>Pinyon-Juniper</b>          |                 |                       |                        |                        |                        |
| Central Basin                  | 0.36            | 0.45(125)             | 0.52(144)              | 0.54(150)              | 0.52(145)              |
| Colorado Plateau               | 0.36            | 0.53(146)             | 0.56(153)              | 0.58(159)              | 0.48(131)              |
| <b>Ponderosa Pine</b>          |                 |                       |                        |                        |                        |
| Eastern Cascades               | 0.31            | 0.38(120)             | 0.50(161)              | 0.43(138)              | 0.49(157)              |
| Sierra Nevada                  | 0.24            | 0.31(130)             | 0.49(205)              | 0.33(136)              | 0.34(143)              |
| Temperate Sierra               | 0.29            | 0.38(129)             | 0.46(157)              | 0.40(138)              |                        |
| Southern Rockies               | 0.45            | 0.42(94)              | 0.48(106)              | 0.37(82)               |                        |
| <b>Spruce-Fir_Hemlock</b>      |                 |                       |                        |                        |                        |
| Idaho Batholith                | 0.37            | 0.41(111)             | 0.44(119)              | 0.48(130)              | 0.49(132)              |
| Canadian Rockies               | 0.27            | 0.33(123)             | 0.43(163)              | 0.47(177)              | 0.44(166)              |
| Middle Rockies                 | 0.51            | 0.48(95)              | 0.56(110)              | 0.60(117)              |                        |
| Northern Cascades              | 0.31            | 0.35(112)             | 0.38(122)              | 0.42(136)              | 0.38(123)              |

Table S5: Model performance

| Forest Types       | OOBE ( $r^2$ ) |               | OOBE ( $r^2$ ) |               |
|--------------------|----------------|---------------|----------------|---------------|
|                    | 10-Yr LAI      | 20-Yr LAI     | 10-Yr Albedo   | 20-Yr Albedo  |
| Mixed Conifer      | 0.0306 (0.73)  | 0.0385 (0.66) | 0.0044 (0.79)  | 0.0034 (0.76) |
| Lodgepole pine     | 0.0323 (0.65)  | 0.0258 (0.69) | 0.0129 (0.65)  | 0.0091 (0.52) |
| Douglas-fir        | 0.042 (0.78)   | 0.058 (0.65)  | 0.0079 (0.68)  | 0.009 (0.7)   |
| Ponderosa pine     | 0.039 (0.7)    | 0.049 (0.72)  | 0.0054 (0.83)  | 0.0052 (0.82) |
| Pinyon-Juniper     | 0.05 (0.66)    | 0.052 (0.67)  | 0.0081 (0.77)  | 0.0079 (0.77) |
| Oak                | 0.079 (0.77)   | 0.092 (0.78)  | 0.004 (0.72)   | 0.0041 (0.72) |
| Spruce/Fir/Hemlock | 0.046 (0.69)   | 0.035 (0.71)  | 0.0139 (0.55)  | 0.016 (0.52)  |



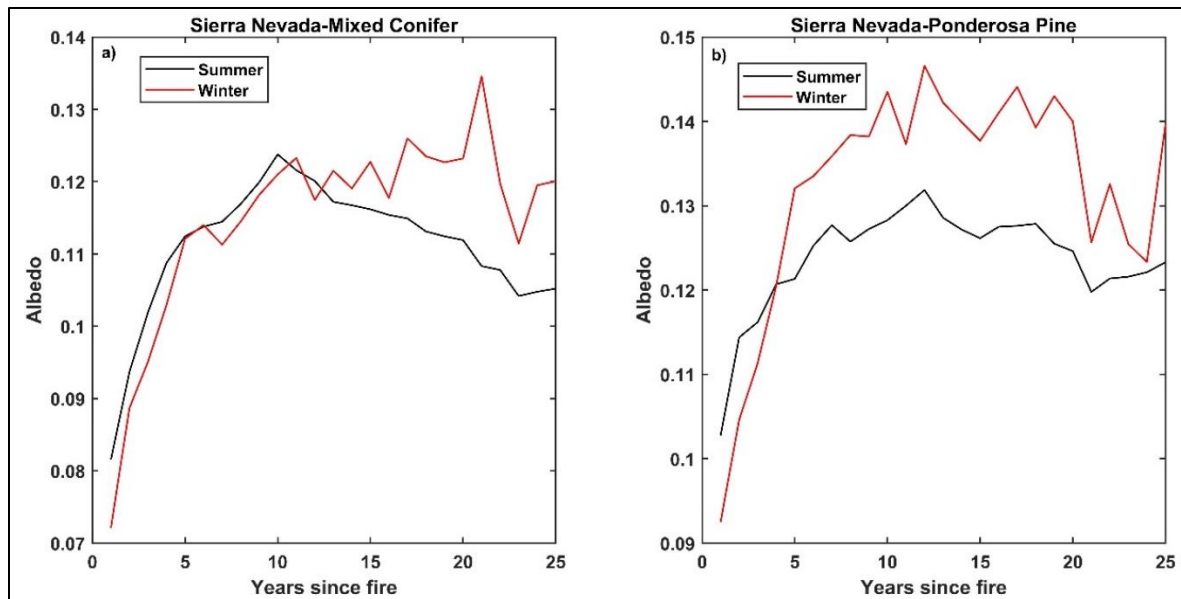

Figure S1: Mean snow-free summer and winter post-fire albedo as a function of time since fire in mixed conifer and ponderosa pine forests of Sierra Nevada.

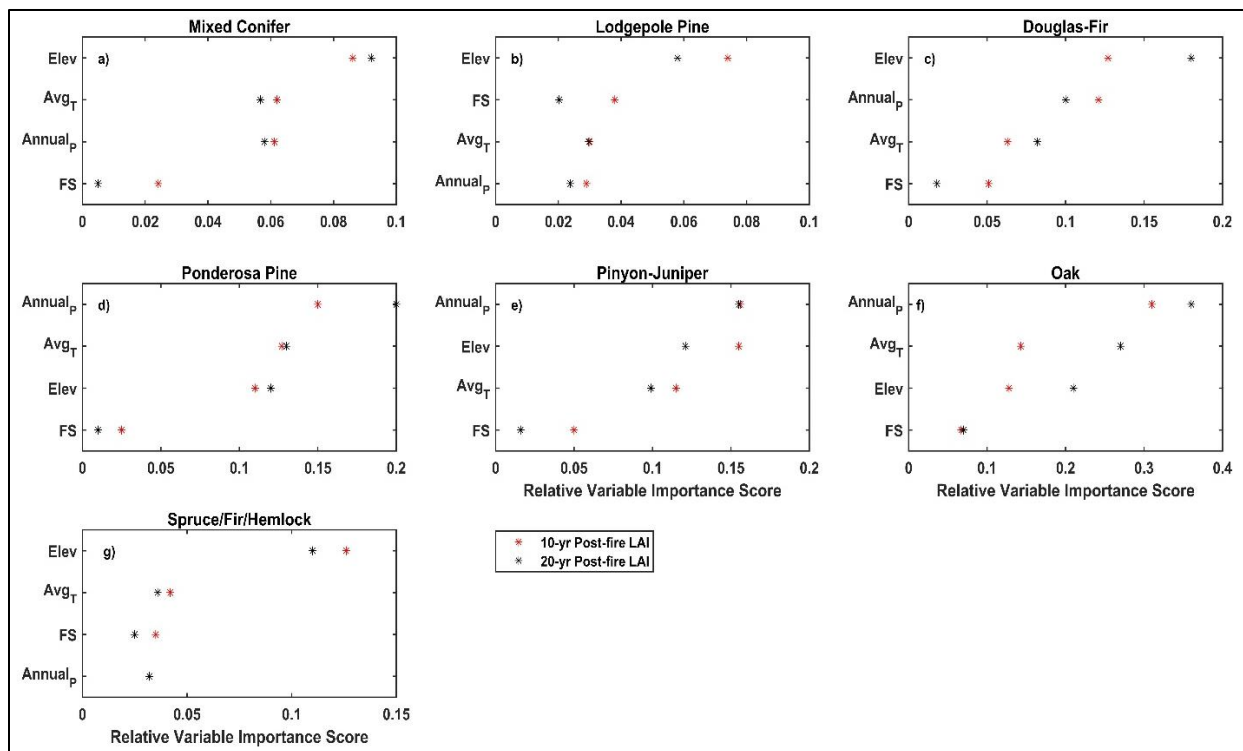

Figure S2: Relative variable importance scores for simulating degree of post-fire summer LAI recovery. (Predictors: Elev = elevation; Avg<sub>T</sub> = mean summer temperature; Annual<sub>p</sub> = annual total precipitation; FS – fire severity).

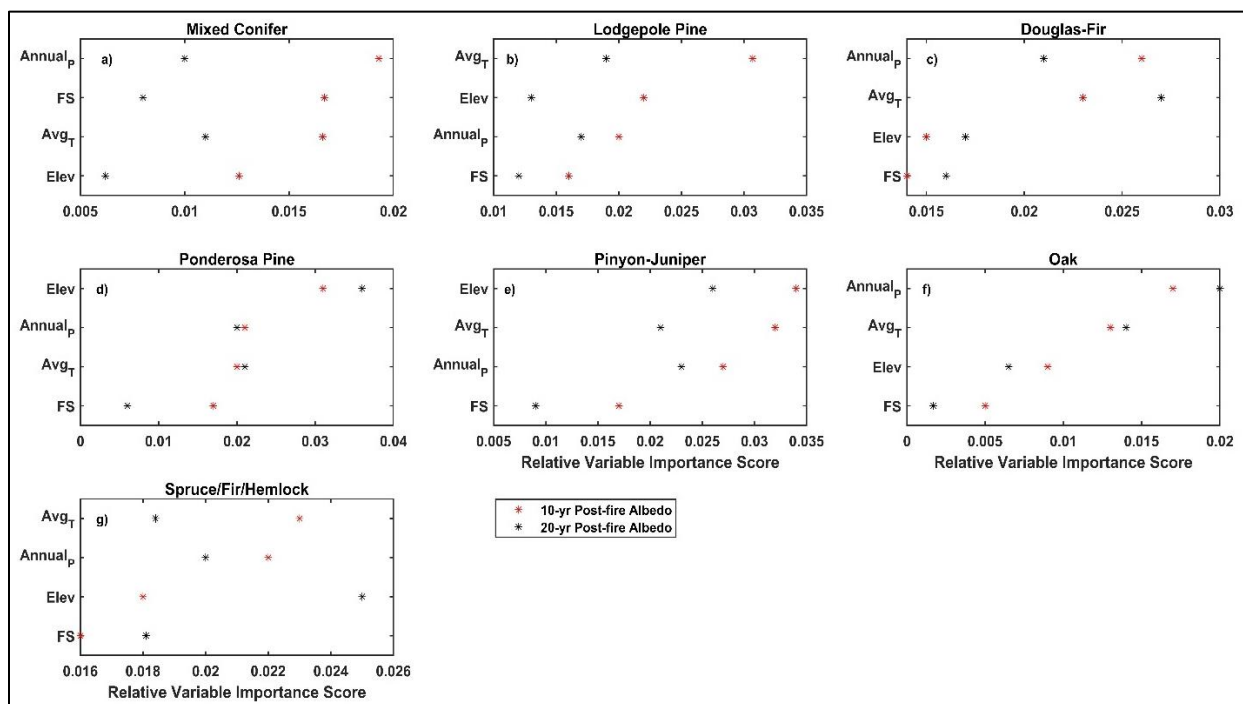

Figure S3: Relative variable importance scores for simulating degree of post-fire summer albedo recovery.

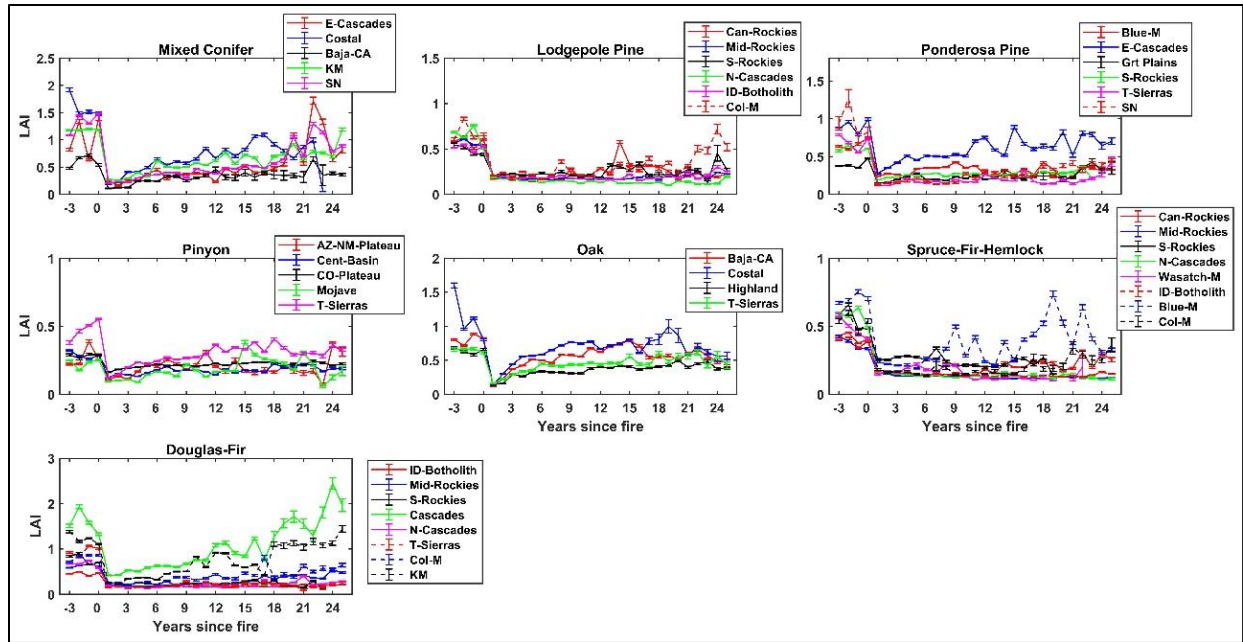

Figure S4: Mean winter post-fire LAI ( $\pm$  SE) as a function of time since fire in seven different forest types of the western US.
